# Supplementary material for: Benthic archaea as potential sources of tetraether membrane lipids in sediments across an oxygen minimum zone
Source: Copernicus journal article supplement (doi:10.5194/bg-15-4047-2018), 2018-07-04
Supplement: Supplementary file 1 [file GDGTs table.xlsx]

## Sheet: Per IPL
	Relative amounts of GDGTs
		GDGT-0					GDGT-1			GDGT-2			GDGT-3			GDGT-4			Cren
	Sediment Code	MH	DH			HPH	MH	DH	HPH	MH	DH	HPH	MH	DH	HPH	MH	DH	HPH	MH	DH	HPH
			Hex-GDGT-Hex	DH-GDGT-OH	Nan-GDGT-Hex
	PA1S0	0.00270606	ND	ND	ND	ND	0.000718465	0.0158234	ND	0.000543799	0.295048	ND	ND	0.178317	ND	ND	0.0609247	ND	0.0126499	0.430706	0.00256317
	PA1S10	0.00344523	ND	0.0783505	0.0162388	0.021001	0.00094307	0.017328	0.000857301	0.0017972	0.269682	ND	0.000508019	0.158724	ND	ND	0.093602	ND	0.0108346	0.311454	0.0152341
	PA4S0	0.0107784	ND	ND	ND	0.365586	0.000779567	0.0147942	0.00180293	ND	0.154028	ND	7.50187e-05	0.0688323	ND	ND	0.0272065	ND	0.0143436	0.155197	0.186576
	PA4S10	0.0222313	0.00869376	0.0180959	0.00362929	0.0210087	0.00191281	0.0665971	ND	0.000521778	0.29661	ND	0.000313417	0.144661	ND	ND	0.0607868	ND	0.026759	0.323973	0.00420595
	PA9S0	0.00229572	0.00127409	ND	ND	0.715007	0.000100827	0.00117828	0.00416095	ND	0.00779144	ND	ND	0.00202741	ND	ND	0.000167421	ND	0.0023367	0.00573568	0.257859
	PA9S10	0.0425676	0.0271339	ND	ND	0.185883	0.000917471	0.058086	ND	ND	0.232376	ND	ND	0.0961161	ND	ND	0.028991	ND	0.035241	0.28306	0.00962701
	PA10S0	0.00474576	0.000752325	ND	ND	0.802574	ND	0.00228657	ND	ND	0.00885897	ND	ND	0.00407154	ND	ND	0.000382546	ND	0.00374607	0.00164984	0.170933
	PA10S10	0.0913716	0.0336167	ND	ND	0.130028	0.00238917	0.0432637	ND	ND	0.219333	ND	ND	0.0969411	ND	ND	0.0561634	ND	0.0824569	0.238754	0.00568256
Sample	Depth (mbsl)	GDGT-0					GDGT-1			GDGT-2			GDGT-3			GDGT-4			Cren
		MH	DH			HPH	MH	DH	HPH	MH	DH	HPH	MH	DH	HPH	MH	DH	HPH	MH	DH	HPH
			Hex-GDGT-Hex	DH-GDGT-OH	Nan-GDGT-Hex
Surface	885	0.00270606	ND	ND	ND	ND	0.000718465	0.0158234	ND	0.000543799	0.295048	ND	ND	0.178317	ND	ND	0.0609247	ND	0.0126499	0.430706	0.00256317
	1306	0.0107784	ND	ND	ND	0.365586	0.000779567	0.0147942	0.00180293	ND	0.154028	ND	7.50187e-05	0.0688323	ND	ND	0.0272065	ND	0.0143436	0.155197	0.186576
	2470	0.00229572	0.00127409	ND	ND	0.715007	0.000100827	0.00117828	0.00416095	ND	0.00779144	ND	ND	0.00202741	ND	ND	0.000167421	ND	0.0023367	0.00573568	0.257859
	3003	0.00474576	0.000752325	ND	ND	0.802574	ND	0.00228657	ND	ND	0.00885897	ND	ND	0.00407154	ND	ND	0.000382546	ND	0.00374607	0.00164984	0.170933
Deep	885	0.00344523	ND	0.0783505	0.0162388	0.021001	0.00094307	0.017328	0.000857301	0.0017972	0.269682	ND	0.000508019	0.158724	ND	ND	0.093602	ND	0.0108346	0.311454	0.0152341
	1306	0.0222313	0.00869376	0.0180959	0.00362929	0.0210087	0.00191281	0.0665971	ND	0.000521778	0.29661	ND	0.000313417	0.144661	ND	ND	0.0607868	ND	0.026759	0.323973	0.00420595
	2470	0.0425676	0.0271339	ND	ND	0.185883	0.000917471	0.058086	ND	ND	0.232376	ND	ND	0.0961161	ND	ND	0.028991	ND	0.035241	0.28306	0.00962701
	3003	0.0913716	0.0336167	ND	ND	0.130028	0.00238917	0.0432637	ND	ND	0.219333	ND	ND	0.0969411	ND	ND	0.0561634	ND	0.0824569	0.238754	0.00568256
						0.365586					0.269682									0.311454
						0.715007					0.29661									0.323973
						0.802574					0.232376									0.28306
											0.219333									0.238754
																			-0.922364

## Sheet: Sheet2
SUMMARY OUTPUT
Regression Statistics
Multiple R	0.928004
R Square	0.861191
Adjusted R Square	0.791786
Standard Error	0.0427206
Observations	4
ANOVA
	df	SS	MS	F	Significance F
Regression	1	0.0226457	0.0226457	12.4083	0.0719963
Residual	2	0.0036501	0.00182505
Total	3	0.0262958
	Coefficients	Standard Error	t Stat	P-value	Lower 95%	Upper 95%	Lower 95.0%	Upper 95.0%
Intercept	2.42836	0.63982	3.79538	0.0629381	-0.324566	5.18128	-0.324566	5.18128
X Variable 1	-6.68764	1.89853	-3.52254	0.0719963	-14.8563	1.48107	-14.8563	1.48107

## Sheet: Incl Sums and splitted table
	Sample	Depth (mbsl)	GDGT-0						GDGT-1				GDGT-2				GDGT-3				GDGT-4				Cren						Sample	Depth (mbsl)	GDGT-0						GDGT-1				GDGT-2					Sample	Depth (mbsl)
			MH	DH			HPH	Sum	MH	DH	HPH	Sum	MH	DH	HPH	Sum	MH	DH	HPH	Sum	MH	DH	HPH	Sum	MH	DH	HPH	Sum					MH	DH			HPH	Sum	MH	DH	HPH	Sum	MH	DH	HPH	Sum
				Hex-GDGT-Hex	DH-GDGT-OH	Nan-GDGT-Hex																												Hex-GDGT-Hex	DH-GDGT-OH	Nan-GDGT-Hex
	Surface	885	0.00270606	0	0	0	0	0.00270606	0.000718465	0.0158234	0	0.0165418	0.000543799	0.295048	0	0.295592	0	0.178317	0	0.178317	0	0.0609247	0	0.0609247	0.0126499	0.430706	0.00256317	0.445919			Surface	885	0.3					0.270606	0.0718465	1.58234		1.65418	0.0543799	29.5048		29.5592		Surface	885
		1306	0.0107784	0	0	0	0.365586	0.376365	0.000779567	0.0147942	0.00180293	0.0173767	0	0.154028	0	0.154028	7.50187e-05	0.0688323	0	0.0689073	0	0.0272065	0	0.0272065	0.0143436	0.155197	0.186576	0.356117				1306	1.07784				36.5586	37.6365	0.0779567	1.47942	0.180293	1.73767		15.4028		15.4028			1306
		2470	0.00229572	0.00127409	0	0	0.715007	0.718577	0.000100827	0.00117828	0.00416095	0.00544006	0	0.00779144	0	0.00779144	0	0.00202741	0	0.00202741	0	0.000167421	0	0.000167421	0.0023367	0.00573568	0.257859	0.265932				2470	0.229572	0.127409			71.5007	71.8577	0.0100827	0.117828	0.416095	0.544006		0.779144		0.779144			2470
		3003	0.00474576	0.000752325	0	0	0.802574	0.808072	0	0.00228657	0	0.00228657	0	0.00885897	0	0.00885897	0	0.00407154	0	0.00407154	0	0.000382546	0	0.000382546	0.00374607	0.00164984	0.170933	0.176329				3003	0.474576	0.0752325			80.2574	80.8072		0.228657		0.228657		0.885897		0.885897			3003
	Deep	885	0.00344523	0	0.0783505	0.0162388	0.021001	0.119036	0.00094307	0.017328	0.000857301	0.0191283	0.0017972	0.269682	0	0.271479	0.000508019	0.158724	0	0.159232	0	0.093602	0	0.093602	0.0108346	0.311454	0.0152341	0.337523			Deep	885	0.344523		7.83505	1.62388	2.1001	11.9036	0.094307	1.7328	0.0857301	1.91283	0.17972	26.9682		27.1479		Deep	885
		1306	0.0222313	0.00869376	0.0180959	0.00362929	0.0210087	0.0736591	0.00191281	0.0665971	0	0.0685099	0.000521778	0.29661	0	0.297132	0.000313417	0.144661	0	0.144975	0	0.0607868	0	0.0607868	0.026759	0.323973	0.00420595	0.354938				1306	2.22313	0.869376	1.80959	0.362929	2.10087	7.36591	0.191281	6.65971		6.85099	0.0521778	29.661		29.7132			1306
		2470	0.0425676	0.0271339	0	0	0.185883	0.255585	0.000917471	0.058086	0	0.0590035	0	0.232376	0	0.232376	0	0.0961161	0	0.0961161	0	0.028991	0	0.028991	0.035241	0.28306	0.00962701	0.327928				2470	4.25676	2.71339			18.5883	25.5585	0.0917471	5.8086		5.90035		23.2376		23.2376			2470
		3003	0.0913716	0.0336167	0	0	0.130028	0.255016	0.00238917	0.0432637	0	0.0456529	0	0.219333	0	0.219333	0	0.0969411	0	0.0969411	0	0.0561634	0	0.0561634	0.0824569	0.238754	0.00568256	0.326894				3003	9.13716	3.36167			13.0028	25.5016	0.238917	4.32637		4.56529		21.9333		21.9333			3003
	Sample	Depth (mbsl)	GDGT-0						GDGT-1				GDGT-2				GDGT-3				GDGT-4				Cren
			MH	DH			HPH	Sum	MH	DH	HPH	Sum	MH	DH	HPH	Sum	MH	DH	HPH	Sum	MH	DH	HPH	Sum	MH	DH	HPH	Sum
				Hex-GDGT-Hex	DH-GDGT-OH	Nan-GDGT-Hex
	Surface	885	0.00270606	ND	ND	ND	ND	0.00270606	0.000718465	0.0158234	ND	0.0165418	0.000543799	0.295048	ND	0.295592	ND	0.178317	ND	0.178317	ND	0.0609247	ND	0.0609247	0.0126499	0.430706	0.00256317	0.445919
		1306	0.0107784	ND	ND	ND	0.365586	0.376365	0.000779567	0.0147942	0.00180293	0.0173767	ND	0.154028	ND	0.154028	7.50187e-05	0.0688323	ND	0.0689073	ND	0.0272065	ND	0.0272065	0.0143436	0.155197	0.186576	0.356117
		2470	0.00229572	0.00127409	ND	ND	0.715007	0.718577	0.000100827	0.00117828	0.00416095	0.00544006	ND	0.00779144	ND	0.00779144	ND	0.00202741	ND	0.00202741	ND	0.000167421	ND	0.000167421	0.0023367	0.00573568	0.257859	0.265932
		3003	0.00474576	0.000752325	ND	ND	0.802574	0.808072	ND	0.00228657	ND	0.00228657	ND	0.00885897	ND	0.00885897	ND	0.00407154	ND	0.00407154	ND	0.000382546	ND	0.000382546	0.00374607	0.00164984	0.170933	0.176329
	Deep	885	0.00344523	ND	0.0783505	0.0162388	0.021001	0.119036	0.00094307	0.017328	0.000857301	0.0191283	0.0017972	0.269682	ND	0.271479	0.000508019	0.158724	ND	0.159232	ND	0.093602	ND	0.093602	0.0108346	0.311454	0.0152341	0.337523		0.28931	0.2545
		1306	0.0222313	0.00869376	0.0180959	0.00362929	0.0210087	0.0736591	0.00191281	0.0665971	ND	0.0685099	0.000521778	0.29661	ND	0.297132	0.000313417	0.144661	ND	0.144975	ND	0.0607868	ND	0.0607868	0.026759	0.323973	0.00420595	0.354938		0.0378013	0.0352608
		2470	0.0425676	0.0271339	ND	ND	0.185883	0.255585	0.000917471	0.058086	ND	0.0590035	ND	0.232376	ND	0.232376	ND	0.0961161	ND	0.0961161	ND	0.028991	ND	0.028991	0.035241	0.28306	0.00962701	0.327928
		3003	0.0913716	0.0336167	ND	ND	0.130028	0.255016	0.00238917	0.0432637	ND	0.0456529	ND	0.219333	ND	0.219333	ND	0.0969411	ND	0.0969411	ND	0.0561634	ND	0.0561634	0.0824569	0.238754	0.00568256	0.326894			Sample	Depth (mbsl)	GDGT-0						GDGT-1				GDGT-2					Sample	Depth (mbsl)
																																	MH	DH			HPH	Sum	MH	DH	HPH	Sum	MH	DH	HPH	Sum
RP Bremen method																																		Hex-GDGT-Hex	DH-GDGT-OH	Nan-GDGT-Hex
	Relative abundance (%)																														Surface	885	0.3	0	0	0	0	0.27	0.07	1.58	0	1.65	0.05	29.5	0	29.5592		Surface	885
					Mass areas			1st peak																								1306	1.08	0	0	0	36.56	37.64	0.08	1.48	0.18	1.74	0	15.4	0	15.4028			1306
				PAF RT	PAF Internal Standard	GDGT-0	DH				GDGT-1			GDGT-2			GDGT-3			GDGT-4			Cren	!!! RT lower then for e.g. DH-GDGT-4								2470	0.23	0.13	0	0	71.5	71.86	0.01	0.12	0.42	0.54	0	0.78	0	0.779144			2470
	Sample Code	Sediment Code				MH	"original"	I	II	HPH	MH	DH	HPH	MH	DH	HPH	MH	DH	HPH	MH	DH	HPH	MH	DH	HPH							3003	0.47	0.08	0	0	80.26	80.81	0	0.23	0	0.23	0	0.89	0	0.885897			3003
	O1712031	PA1S0	5/40	9.63	498797818	23.9874	0.403045				6.17464	1.48272		9.69988	12.1684		1.09679	6.30212			2.64048		26.9741	9.07038							Deep	885	0.34	0	7.84	1.62	2.1	11.9	0.09	1.73	0.09	1.91	0.18	26.97	0	27.1479		Deep	885
	O1712041	PA4S0	5/40	9.63	439313465	38.2961	0.721067			5.19878	4.57999	1.91988		4.24467	7.69579		0.506485	2.09208		0.357905	1.39215		26.5807	4.67286	1.74153							1306	2.22	0.87	1.81	0.36	2.1	7.37	0.19	6.66	0	6.85	0.05	29.66	0	29.7132			1306
	O1712038	P9S0	5/40	9.61	416589494	25.5336	0.337016			40.4554	1.22945	0.464902	0.224974	1.02799	1.53631		0.05372	0.395927		0.0299772	0.286021		11.6778	0.73315	16.0138							2470	4.26	2.71	0	0	18.59	25.56	0.09	5.81	0	5.9	0	23.24	0	23.2376			2470
	O1712032	PA10S0	5/40	9.63	453582058	31.8093	0.251905			38.6752	0.897992	0.279468		0.723982	0.993666			0.340214			0.32871		14.7242	0.609657	10.3657							3003	9.14	3.36	0	0	13	25.5	0.24	4.33	0	4.57	0	21.93	0	21.9333			3003
	O1712030	PA1S10	5/40	9.64	598925952	26.312	1.21269	4.41817		0.045924	5.11398	1.72949		7.52219	12.6637		1.23294	6.92563		0.330671	2.70808		20.624	9.16058
	O1712037	PA4S10	5/40	9.62	77896268	39.4099	1.31444	1.64268		0.121746	4.80202	2.36145		4.18992	9.10659		0.757088	3.79736		0.424821	2.24227		24.4776	5.35216
	O1712040	PA9S10	5/40	9.63	1802014885	57.2233	1.18979			0.538895	2.55644	1.62745		1.9144	4.16677		0.27056	1.40802		0.105488	0.648478		25.8266	2.4968	0.0270577
	O1712039	PA10S10	5/40	9.65	2969462854	57.1597	0.769705			0.240985	2.61488	0.824323		2.01118	2.58608		0.285179	0.905238		0.128151	0.493392		30.3952	1.58603
																					Relative abundance
																			Surface sediment		Regression GDGT-0 (sum) vs Cren (sum)
												0.119036	0.337523		0.00270606	0.445919			SUMMARY OUTPUT
												0.0736591	0.354938		0.376365	0.356117
												0.255585	0.327928		0.718577	0.265932			Regression Statistics
												0.255016	0.326894		0.808072	0.176329			Multiple R	0.971708
																			R Square	0.944216
																			Adjusted R Square	0.916324
												0.352674			0.00606851				Standard Error	0.106028
												0.207527			1.05686				Observations	4
												0.779393			2.70211
	Per head group											0.78012			4.58276				ANOVA
	Sample	Depth (mbsl)	MH	DH	HCP	HPH	Total	plus Cyclopenta…..												df	SS	MS	F	Significance F
	Surface	885	0.0166182	0.980819	0	0.00256317	1												Regression	1	0.380565	0.380565	33.8526	0.0282922
		1306	0.0259765	0.420058	0	0.553965	1												Residual	2	0.0224837	0.0112418
		2470	0.00473325	0.0181743	0	0.977027	0.999935												Total	3	0.403049
		3003	0.00849183	0.0180018	0	0.973506	1
	Deep	885	0.0175281	0.929141	0.0162388	0.0370925	1	0.0162388												Coefficients	Standard Error	t Stat	P-value	Lower 95%	Upper 95%	Lower 95.0%	Upper 95.0%
		1306	0.0517383	0.919418	0.00362929	0.0252147	1	0.00362929											Intercept	1.4311	0.172433	8.29948	0.014209	0.689184	2.17302	0.689184	2.17302
		2470	0.0787261	0.725763	0	0.19551	1												X Variable 1	-3.06896	0.527467	-5.8183	0.0282922	-5.33847	-0.799452	-5.33847	-0.799452
		3003	0.176218	0.688072	0	0.135711	1
[truncated: 13 more columns]
