# Supplementary material for: Benthic archaea as potential sources of tetraether membrane lipids in sediments across an oxygen minimum zone
Source: Copernicus journal article supplement (doi:10.5194/bg-15-4047-2018), 2018-07-04
Supplement: Supplementary file 2 [file bg-15-4047-2018-supplement.zip]

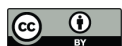

*Supplement of*

**Benthic archaea as potential sources of tetraether membrane lipids in sediments across an oxygen minimum zone**

**Marc A. Besseling et al.**

*Correspondence to:* Marc A. Besseling ([marc.besseling@nioz.nl](mailto:marc.besseling@nioz.nl))

- [bg-15-4047-2018-supplement-title-page.pdf](#)
- [GDGTs table.xlsx](#)
- [REVISED Supplementary figures and tables.pdf](#)

The copyright of individual parts of the supplement might differ from the CC BY 4.0 License.
