# Supplementary material for: Benthic archaea as potential sources of tetraether membrane lipids in sediments across an oxygen minimum zone
Source: Copernicus journal article supplement (doi:10.5194/bg-15-4047-2018), 2018-07-04
Supplement: Supplementary file 3 [file bg-15-4047-2018-supplement.zip]

Archive with 3 entries (3 files):
- REVISED Supplementary figures and tables.pdf
- GDGTs table.xlsx
- bg-15-4047-2018-supplement-title-page.pdf
